# Supplementary material for: Citicoline and Memory Function in Healthy Older Adults: A Randomized, Double-Blind, Placebo-Controlled Clinical Trial
Source: PubMed Central journal article supplement (PMC8349115; doi:10.1093/jn/nxab119), 2021-05-12
Supplement: nxab119_supplemental_file.pdf [file nxab119_supplemental_file.pdf]

**Effect of Citicoline on Memory Function in Healthy Older Adults: A Randomized, Double-Blind, Placebo-Controlled Clinical Trial. Nakazaki *et al.* Online supplementary material**

**Supplementary Table 1** Results of hematology panel of the ITT study participants in citicoline supplementation group and the placebo group at weeks 0, and 12 <sup>1</sup>

|                                                  | Baseline (Week 0) | End of study (Week 12) |
|--------------------------------------------------|-------------------|------------------------|
|                                                  | Mean $\pm$ SD     | Mean $\pm$ SD          |
| White Blood Cell (x 10 <sup>3</sup> / $\mu$ L)   |                   |                        |
| Placebo                                          | 6.35 $\pm$ 1.44   | 6.25 $\pm$ 1.86        |
| Citicoline                                       | 6.24 $\pm$ 1.63   | 6.16 $\pm$ 1.59        |
| Red Blood Cell (x 10 <sup>6</sup> / $\mu$ L)     |                   |                        |
| Placebo                                          | 4.73 $\pm$ 0.43   | 4.65 $\pm$ 0.44        |
| Citicoline                                       | 4.79 $\pm$ 0.46   | 4.69 $\pm$ 0.42        |
| Red Blood Cell Distribution Width (%)            |                   |                        |
| Placebo                                          | 13.8 $\pm$ 1.0    | 13.7 $\pm$ 0.9         |
| Citicoline                                       | 13.7 $\pm$ 0.7    | 13.7 $\pm$ 0.9         |
| Hematocrit (%)                                   |                   |                        |
| Placebo                                          | 42.4 $\pm$ 3.3    | 41.8 $\pm$ 3.4         |
| Citicoline                                       | 42.9 $\pm$ 3.8    | 42.1 $\pm$ 3.3         |
| Hemoglobin (g/dL)                                |                   |                        |
| Placebo                                          | 14.2 $\pm$ 1.2    | 13.9 $\pm$ 1.2         |
| Citicoline                                       | 14.4 $\pm$ 1.3    | 14.1 $\pm$ 1.2         |
| Mean Corpuscular Hemoglobin (pg)                 |                   |                        |
| Placebo                                          | 30.0 $\pm$ 2.2    | 30.0 $\pm$ 2.2         |
| Citicoline                                       | 30.0 $\pm$ 1.7    | 30.0 $\pm$ 1.7         |
| Mean Corpuscular Hemoglobin Concentration (g/dL) |                   |                        |
| Placebo                                          | 33.4 $\pm$ 0.7    | 33.2 $\pm$ 0.7         |
| Citicoline                                       | 33.4 $\pm$ 0.7    | 33.4 $\pm$ 0.7         |
| Mean Corpuscular Volume (fL)                     |                   |                        |
| Placebo                                          | 89.9 $\pm$ 5.6    | 90.2 $\pm$ 5.6         |
| Citicoline                                       | 89.9 $\pm$ 4.2    | 89.9 $\pm$ 4.2         |
| Mean Platelet Volume (fL)                        |                   |                        |
| Placebo                                          | 9.05 $\pm$ 0.75   | 9.00 $\pm$ 0.83        |
| Citicoline                                       | 9.03 $\pm$ 0.92   | 9.01 $\pm$ 0.97        |
| Platelet (x 10 <sup>3</sup> / $\mu$ L)           |                   |                        |
| Placebo                                          | 241 $\pm$ 58      | 240 $\pm$ 60           |
| Citicoline                                       | 228 $\pm$ 48      | 232 $\pm$ 51           |
| Basophil (x 10 <sup>3</sup> / $\mu$ L)           |                   |                        |
| Placebo                                          | 0.05 $\pm$ 0.05   | 0.05 $\pm$ 0.05        |
| Citicoline                                       | 0.06 $\pm$ 0.06   | 0.06 $\pm$ 0.05        |
| (%)                                              |                   |                        |
| Placebo                                          | 0.88 $\pm$ 0.52   | 0.86 $\pm$ 0.40        |

|                         |             |             |
|-------------------------|-------------|-------------|
| Citicoline              | 0.98 ± 0.66 | 1.04 ± 0.35 |
| Eosinophil              |             |             |
| (x 10 <sup>3</sup> /μL) |             |             |
| Placebo                 | 0.16 ± 0.10 | 0.21 ± 0.11 |
| Citicoline              | 0.14 ± 0.11 | 0.19 ± 0.12 |
| (%)                     |             |             |
| Placebo                 | 2.65 ± 1.48 | 3.53 ± 1.86 |
| Citicoline              | 2.49 ± 1.98 | 3.13 ± 2.15 |
| Lymphocyte              |             |             |
| (x 10 <sup>3</sup> /μL) |             |             |
| Placebo                 | 1.76 ± 0.49 | 1.88 ± 0.62 |
| Citicoline              | 1.74 ± 0.46 | 1.76 ± 0.44 |
| (%)                     |             |             |
| Placebo                 | 28.3 ± 7.0  | 31.0 ± 7.0  |
| Citicoline              | 28.9 ± 7.5  | 29.9 ± 8.3  |
| Monocyte                |             |             |
| (x 10 <sup>3</sup> /μL) |             |             |
| Placebo                 | 0.55 ± 0.16 | 0.58 ± 0.18 |
| Citicoline              | 0.55 ± 0.17 | 0.57 ± 0.20 |
| (%)                     |             |             |
| Placebo                 | 8.90 ± 2.49 | 9.61 ± 2.46 |
| Citicoline              | 9.00 ± 1.76 | 9.29 ± 1.58 |
| Neutrophil              |             |             |
| (x 10 <sup>3</sup> /μL) |             |             |
| Placebo                 | 3.81 ± 1.22 | 3.49 ± 1.38 |
| Citicoline              | 3.75 ± 1.32 | 3.58 ± 1.31 |
| (%)                     |             |             |
| Placebo                 | 59.2 ± 8.5  | 55.1 ± 8.5  |
| Citicoline              | 58.9 ± 8.0  | 57.0 ± 8.5  |

<sup>1</sup>Values are unadjusted means ± SDs and were measured in fasting whole blood. *n* = 51 for placebo and *n* = 49-48 for citicoline. \* *P* < 0.05. Continuous measures were compared between groups with the Wilcoxon rank sum test. At each time point, the *P* values were adjusted for multiple comparisons with the false discovery rate (FDR).

**Supplementary Table 2.** Results of complete metabolic panel of the ITT study participants in citicoline supplementation group and the placebo group at weeks 0, and 12 <sup>1</sup>

|                                  | Baseline (Week 0) | End of study (Week 12) |
|----------------------------------|-------------------|------------------------|
|                                  | Mean $\pm$ SD     | Mean $\pm$ SD          |
| Glucose (mg/dL)                  |                   |                        |
| Placebo                          | 102 $\pm$ 9       | 100 $\pm$ 12           |
| Citicoline                       | 102 $\pm$ 9       | 101 $\pm$ 12           |
| Sodium (mmol/L)                  |                   |                        |
| Placebo                          | 139 $\pm$ 2       | 139 $\pm$ 2            |
| Citicoline                       | 139 $\pm$ 2       | 139 $\pm$ 2            |
| Potassium (mmol/L)               |                   |                        |
| Placebo                          | 4.72 $\pm$ 0.56   | 4.56 $\pm$ 0.59        |
| Citicoline                       | 4.47 $\pm$ 0.51   | 4.30 $\pm$ 0.53        |
| Chloride (mmol/L)                |                   |                        |
| Placebo                          | 105 $\pm$ 3       | 105 $\pm$ 3            |
| Citicoline                       | 104 $\pm$ 3       | 105 $\pm$ 2            |
| CO <sub>2</sub> (mmol/L)         |                   |                        |
| Placebo                          | 27.6 $\pm$ 2.0    | 27.8 $\pm$ 1.8         |
| Citicoline                       | 27.6 $\pm$ 1.7    | 27.5 $\pm$ 1.6         |
| Blood Urea Nitrogen (mg/dL)      |                   |                        |
| Placebo                          | 13.9 $\pm$ 3.5    | 14.5 $\pm$ 3.3         |
| Citicoline                       | 13.8 $\pm$ 3.7    | 14.4 $\pm$ 3.4         |
| Creatinine (mg/dL)               |                   |                        |
| Placebo                          | 0.86 $\pm$ 0.18   | 0.91 $\pm$ 0.17        |
| Citicoline                       | 0.91 $\pm$ 0.19   | 0.96 $\pm$ 0.20        |
| Total Calcium (mg/dL)            |                   |                        |
| Placebo                          | 9.48 $\pm$ 0.31   | 9.33 $\pm$ 0.35        |
| Citicoline                       | 9.35 $\pm$ 0.34   | 9.27 $\pm$ 0.35        |
| Alkaline Phosphatase (U/L)       |                   |                        |
| Placebo                          | 69.7 $\pm$ 18.5   | 69.3 $\pm$ 19.1        |
| Citicoline                       | 63.0 $\pm$ 16.4   | 65.5 $\pm$ 14.7        |
| Aspartate Aminotransferase (U/L) |                   |                        |
| Placebo                          | 26.1 $\pm$ 6.1    | 24.5 $\pm$ 5.9         |
| Citicoline                       | 25.6 $\pm$ 6.0    | 25.2 $\pm$ 5.9         |
| Alanine Aminotransferase (U/L)   |                   |                        |
| Placebo                          | 25.1 $\pm$ 11.4   | 23.4 $\pm$ 10.2        |
| Citicoline                       | 23.9 $\pm$ 9.1    | 22.2 $\pm$ 6.6         |
| Total Bilirubin (mg/dL)          |                   |                        |
| Placebo                          | 0.78 $\pm$ 0.33   | 0.72 $\pm$ 0.29        |
| Citicoline                       | 0.74 $\pm$ 0.20   | 0.73 $\pm$ 0.28        |
| Total Protein (g/dL)             |                   |                        |
| Placebo                          | 6.98 $\pm$ 0.41   | 6.76 $\pm$ 0.40        |
| Citicoline                       | 6.88 $\pm$ 0.43   | 6.68 $\pm$ 0.45        |
| Albumin (g/dL)                   |                   |                        |
| Placebo                          | 4.10 $\pm$ 0.30   | 3.91 $\pm$ 0.25        |
| Citicoline                       | 4.05 $\pm$ 0.24   | 3.87 $\pm$ 0.22        |
| Globulin (g/dL)                  |                   |                        |
| Placebo                          | 2.88 $\pm$ 0.39   | 2.84 $\pm$ 0.37        |
| Citicoline                       | 2.83 $\pm$ 0.41   | 2.81 $\pm$ 0.42        |

|                                       |             |             |
|---------------------------------------|-------------|-------------|
| Albumin / Globulin Ratio              |             |             |
| Placebo                               | 1.45 ± 0.26 | 1.41 ± 0.22 |
| Citicoline                            | 1.46 ± 0.25 | 1.41 ± 0.22 |
| Anion Gap (mmol/L)                    |             |             |
| Placebo                               | 7.29 ± 1.83 | 6.67 ± 1.44 |
| Citicoline                            | 6.92 ± 1.72 | 6.81 ± 1.51 |
| Blood Urea Nitrogen /Creatinine Ratio |             |             |
| Placebo                               | 16.8 ± 5.1  | 16.3 ± 4.4  |
| Citicoline                            | 15.6 ± 4.6  | 15.7 ± 4.8  |
| Calculated Osmolality (mOsm/kg)       |             |             |
| Placebo                               | 289 ± 5     | 289 ± 4     |
| Citicoline                            | 288 ± 4     | 289 ± 4     |

<sup>1</sup>Values are unadjusted means ± SDs, and were measured in fasting heparin plasma.  $n = 51$  for placebo and  $n = 49-48$  for citicoline. \*  $P < 0.05$ . Continuous measures were compared between groups with the Wilcoxon rank sum test. At each time point, the  $P$  values were adjusted for multiple comparisons with the false discovery rate (FDR).
